# Supplementary material
Source: publisher site journal article supplement (https://www.dovepress.com/article/483231)
Supplement: Supplementary file 1 [file get_supplementary_file.php]

**Supplementary Materials**

**Tabel S1** Descriptive Statistics of the SAS and the SDS

| Labels | Symptoms | Mean | Standard deviation |
| --- | --- | --- | --- |
| SAS1 | Anxiousness | 1.93 | 0.746 |
| SAS2 | Fear | 1.47 | 0.639 |
| SAS3 | Panic | 1.72 | 0.739 |
| SAS4 | Mental disintegration | 1.41 | 0.655 |
| SAS5 | Apprehension | 2.44 | 1.074 |
| SAS6 | Tremors | 1.21 | 0.498 |
| SAS7 | Body aches & pains | 1.78 | 0.823 |
| SAS8 | Easy fatiguability & weakness | 2.03 | 0.834 |
| SAS9 | Restlessness | 2.49 | 0.924 |
| SAS10 | Palpitation | 1.47 | 0.644 |
| SAS11 | Dizziness | 1.49 | 0.691 |
| SAS12 | Faintness | 1.31 | 0.565 |
| SAS13 | Dyspnea | 2.89 | 1.184 |
| SAS14 | Paresthesias | 1.32 | 0.566 |
| SAS15 | Nausea & vomiting | 1.5 | 0.732 |
| SAS16 | Urinary frequency | 1.64 | 0.74 |
| SAS17 | Sweating | 2.56 | 1.047 |
| SAS18 | Face flushing | 1.4 | 0.622 |
| SAS19 | Insomnia | 2.51 | 0.95 |
| SAS20 | Nightmares | 1.59 | 0.713 |
| SDS1 | Depressed affect | 1.71 | 0.737 |
| SDS2 | Diurnal variation | 2.73 | 1.008 |
| SDS3 | Crying spells | 1.42 | 0.642 |
| SDS4 | Sleep disturbance | 1.98 | 0.896 |
| SDS5 | Decreased appetite | 3.01 | 0.932 |
| SDS6 | Decreased libido | 2.49 | 1.067 |
| SDS7 | Weight loss | 1.35 | 0.624 |
| SDS8 | Constipation | 1.55 | 0.8 |
| SDS9 | Tachycardia | 1.36 | 0.595 |
| SDS10 | Fatigue | 1.84 | 0.828 |
| SDS11 | Confusion | 2.93 | 0.962 |
| SDS12 | Psychomotor retardation | 2.72 | 0.978 |
| SDS13 | Psychomotor agitation | 1.56 | 0.719 |
| SDS14 | Hopelessness | 2.94 | 0.949 |
| SDS15 | Irritability | 1.81 | 0.815 |
| SDS16 | Indecisiveness | 2.52 | 0.925 |
| SDS17 | Personal devaluation | 2.92 | 0.915 |
| SDS18 | Emptiness | 2.84 | 0.929 |
| SDS19 | Suicidal rumination | 1.23 | 0.564 |
| SDS20 | Interest loss | 2.99 | 0.935 |


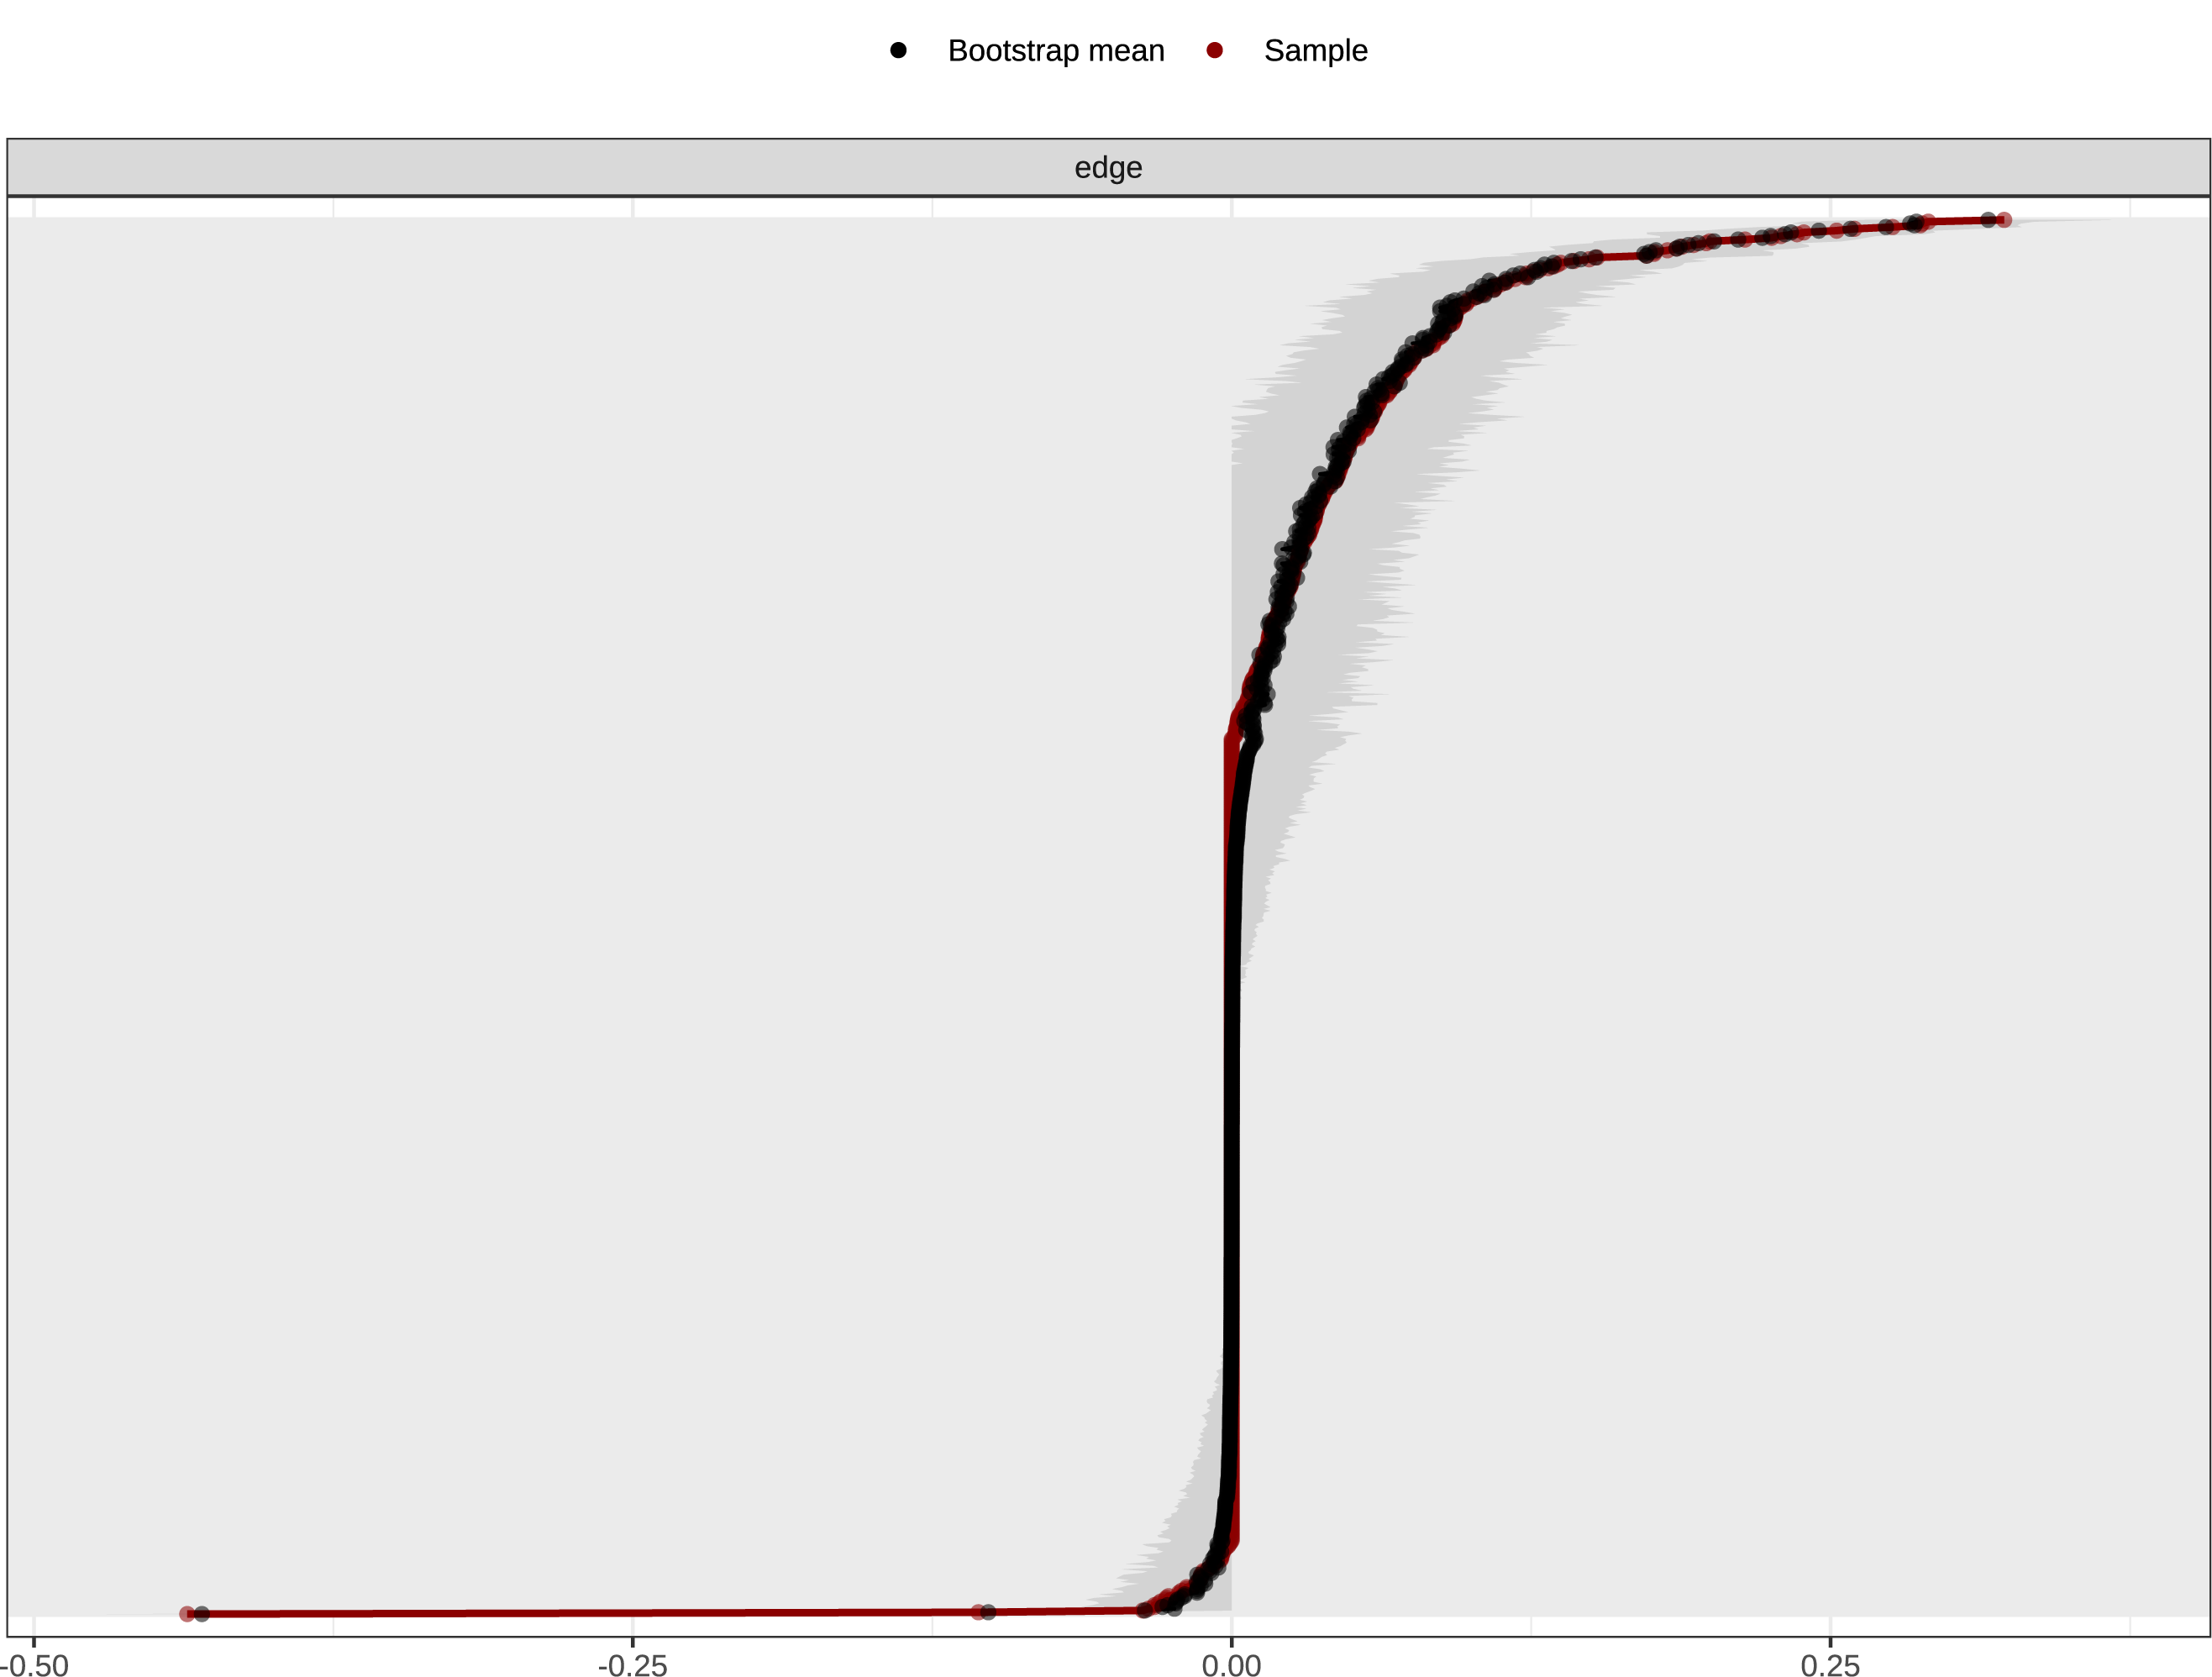


**Figure S1** Bootstrapped Confidence Intervals of All Edge-Weights.

**Note:** The red dots represent each edge-weight’s score in the network, while the black dots represent each edge-weight’s estimated score estimated by means of non-parametric bootstrapping with1,000 bootstraps (nboots = 1,000. The gray area shows the 95% confidence intervals of each edge-weight, estimated by means of non-parametric bootstrapping with 1,000 bootstraps (nboots = 1,000). Wider confidence intervals denote lower stability and narrower intervals denote higher stability.


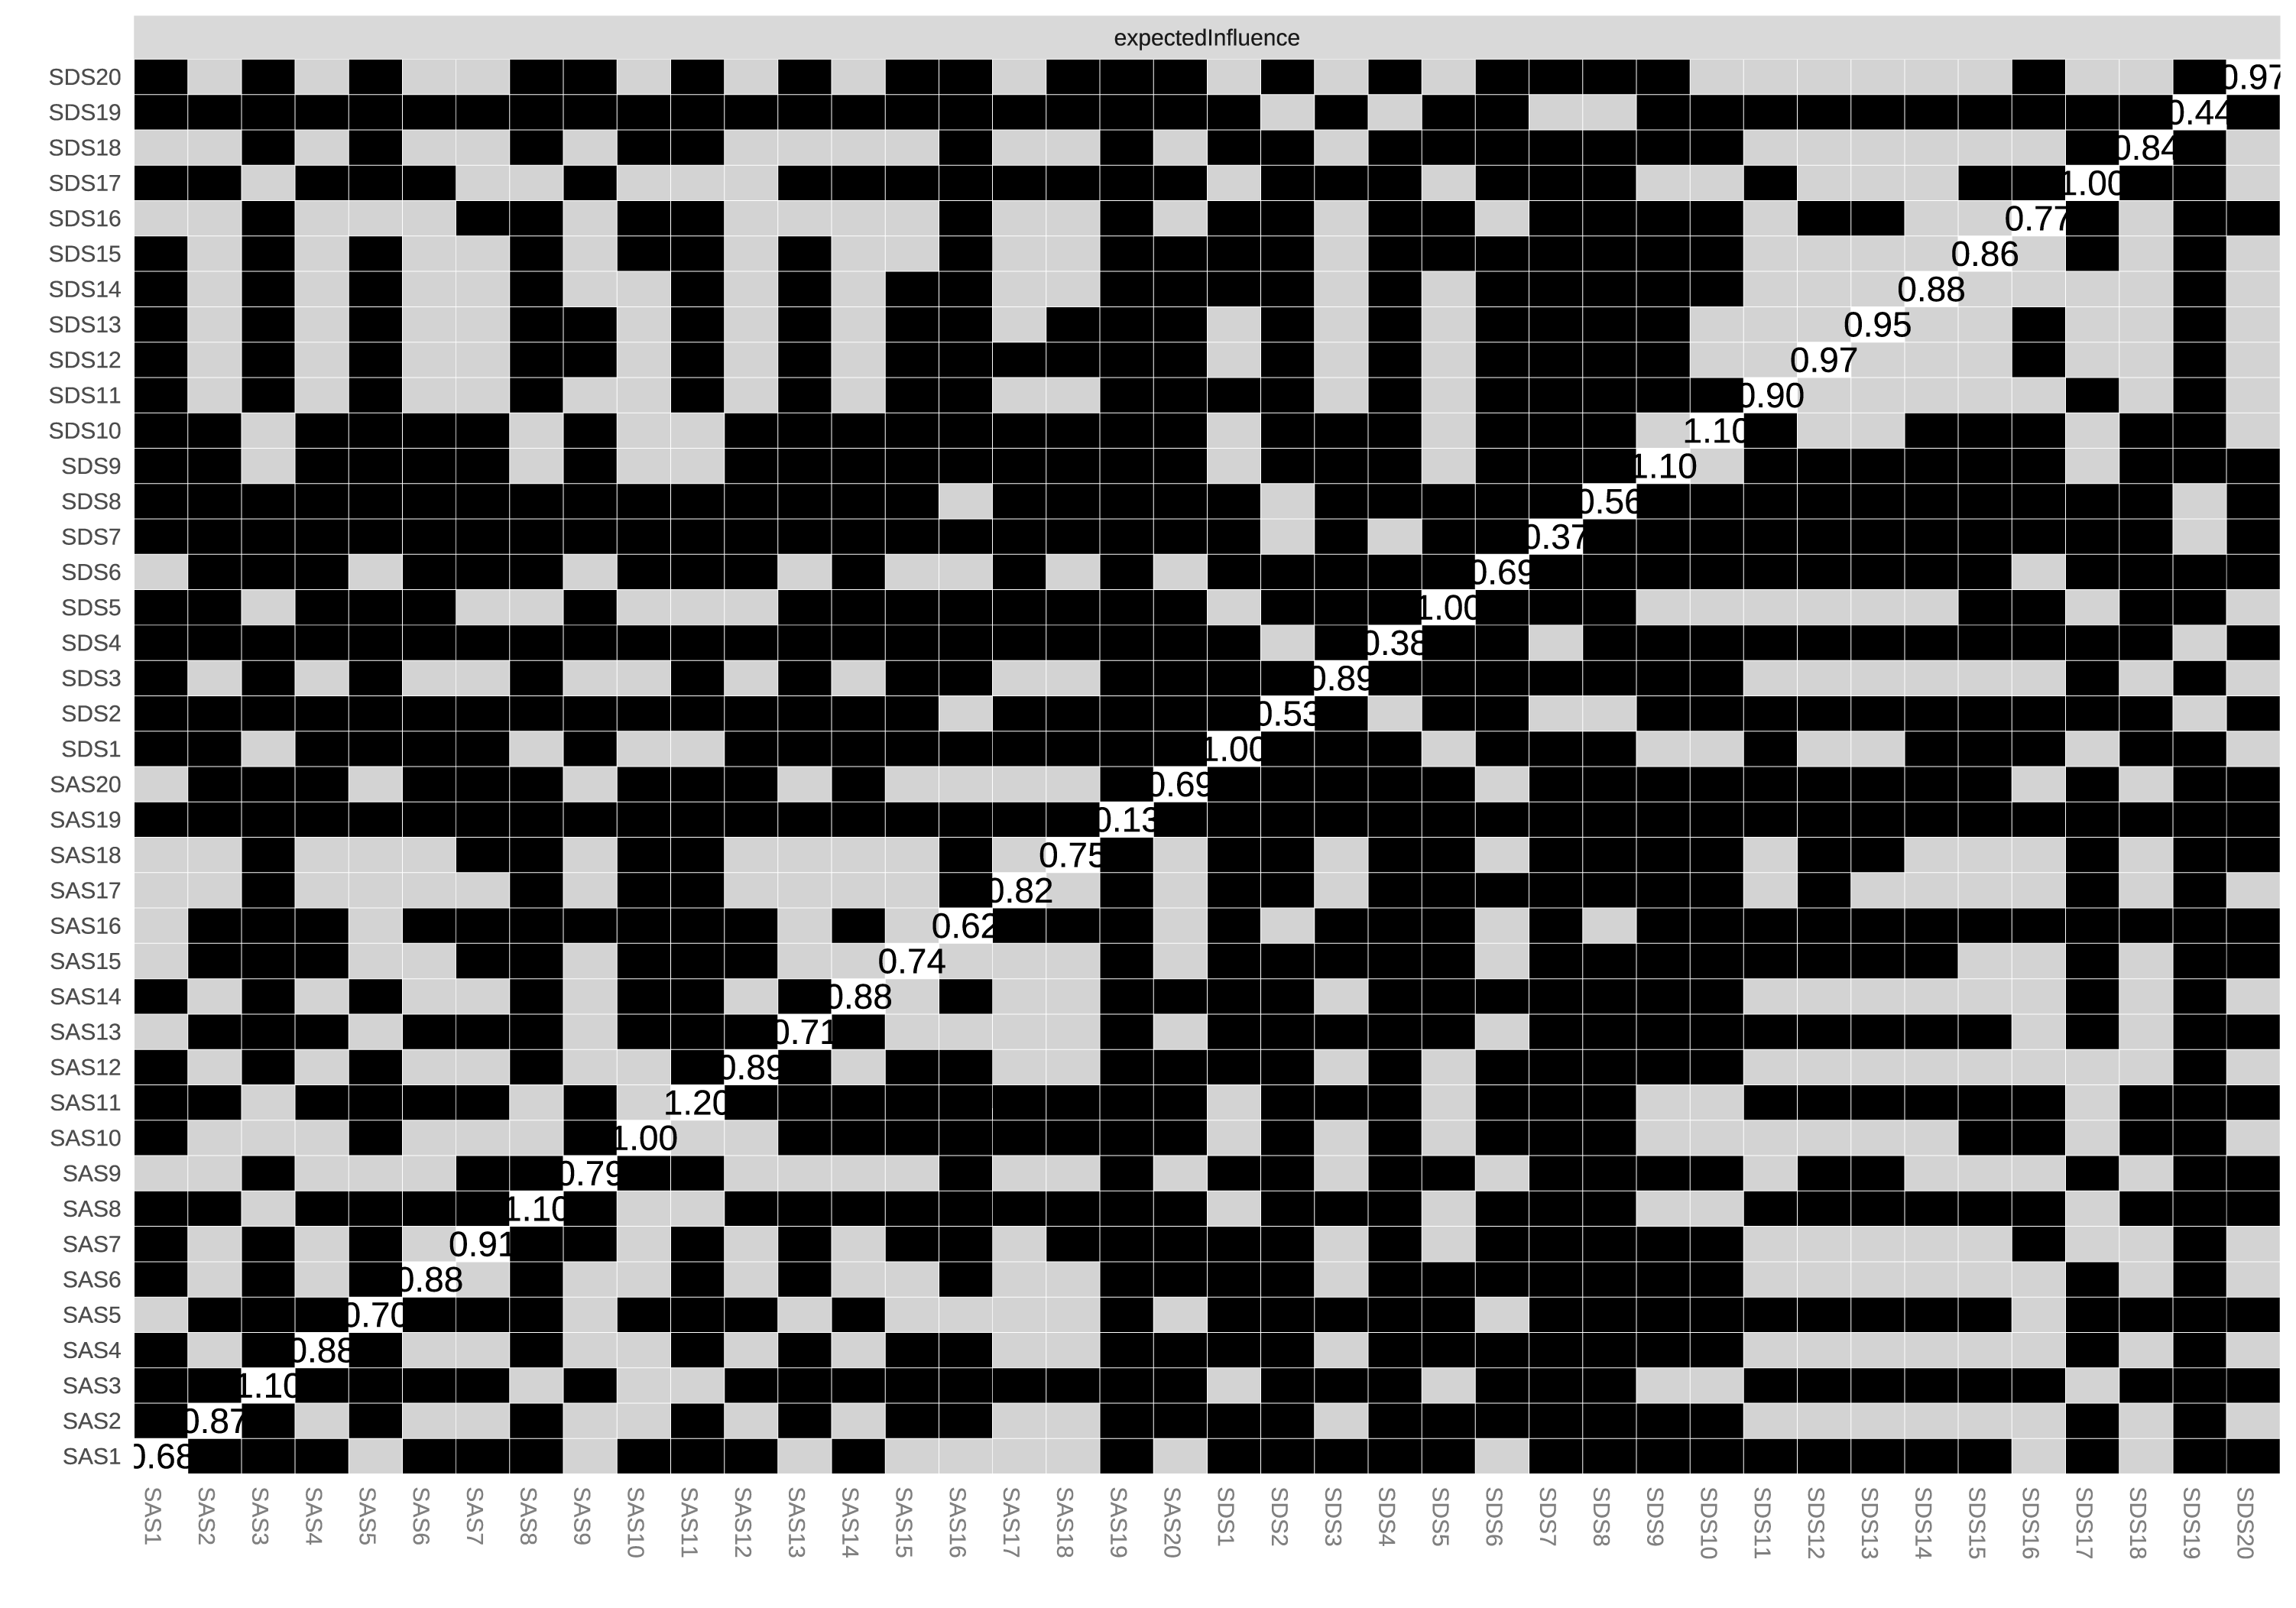


**Figure S2** Bootstrapped Difference Tests for Strength Centrality Index.

**Note:** The difference tests for strength centrality are depicted in this Figure. The color of the boxes indicates whether there is a significant difference in their centrality operationalized by their strength centrality scores between nodes. Grey boxes indicate no significant differences and black boxes indicate significant differences (α = 0.05). The value in the white boxes indicates the value of node strength centrality scores of a specific node.
